# Supplementary material
Source: PubMed Central journal article supplement (PMC4532883)
Supplement: ncomms8937-s1.pdf [file ncomms8937-s1.pdf]

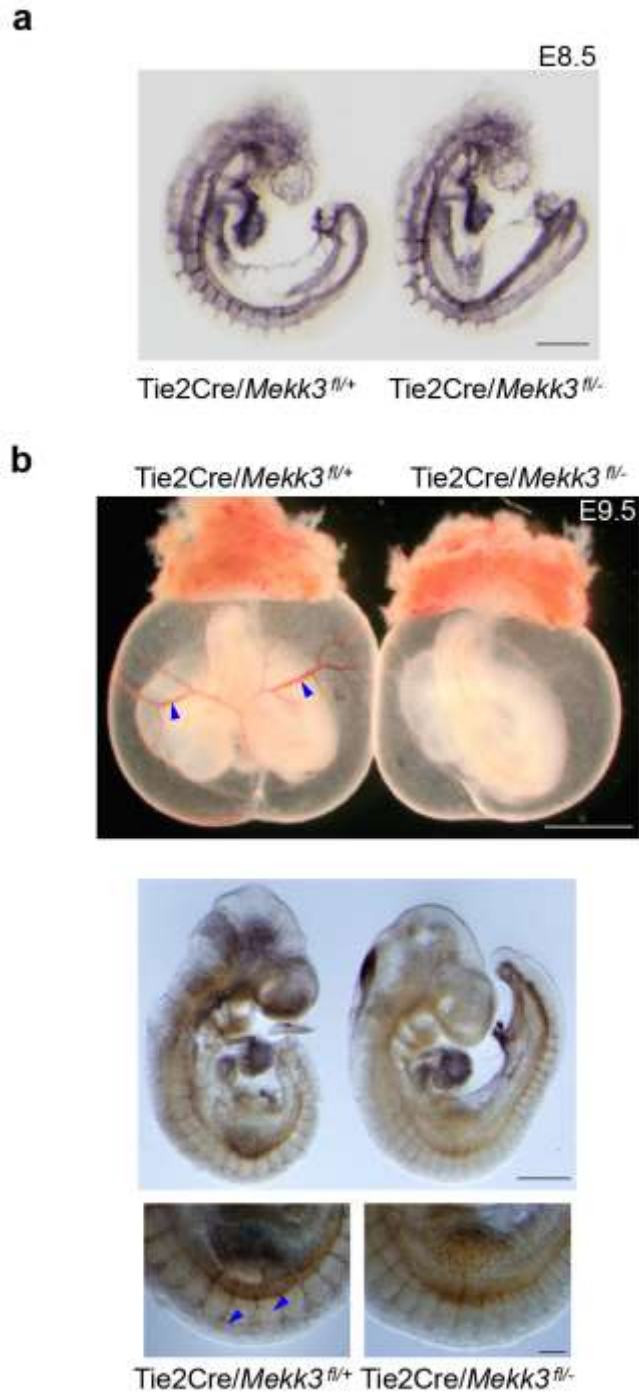

**Supplementary Figure 1. *Mekk3* plays an endothelial-specific role in development.**

**(a)** E8.5 *Mekk3* NCL (Tie2Cre/*Mekk3*<sup>fl/+</sup>) and *Mekk3* EC-cKO (Tie2Cre/*Mekk3*<sup>fl/-</sup>) embryos were

whole mount stained for CD31. Scale bar indicates 300  $\mu$ m. **(b)** E9.5 *Mekk3* NCL and *Mekk3*

EC-cKO embryos were visualized by a dark field microscope (top panels), or were whole-mount

stained for CD31 (middle and bottom panels). The vasculatures in somatic areas were shown at a higher magnified view (bottom panels). Arrowheads show extensive angiogenesis in the NCL embryo but not the *Mekk3* EC-cKO embryo. Top scale bar indicates 600  $\mu\text{m}$ , middle indicates 500  $\mu\text{m}$ , bottom indicates 100  $\mu\text{m}$ .

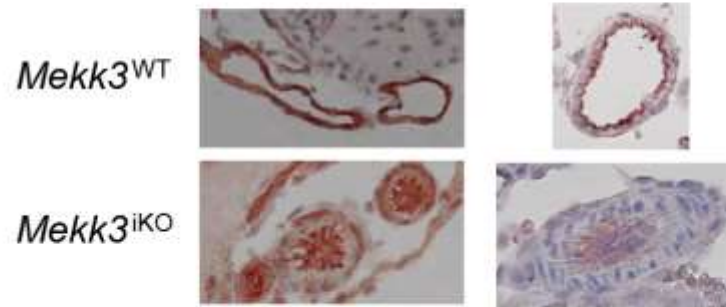

**Supplementary Figure 2. *Mekk3* maintains neonatal brain vasculature patency.**

*Mekk3*<sup>WT</sup> and *Mekk3*<sup>iKO</sup> brain sections were stained for CD31 (brown) as indicated. Power of objective lens: 63X.

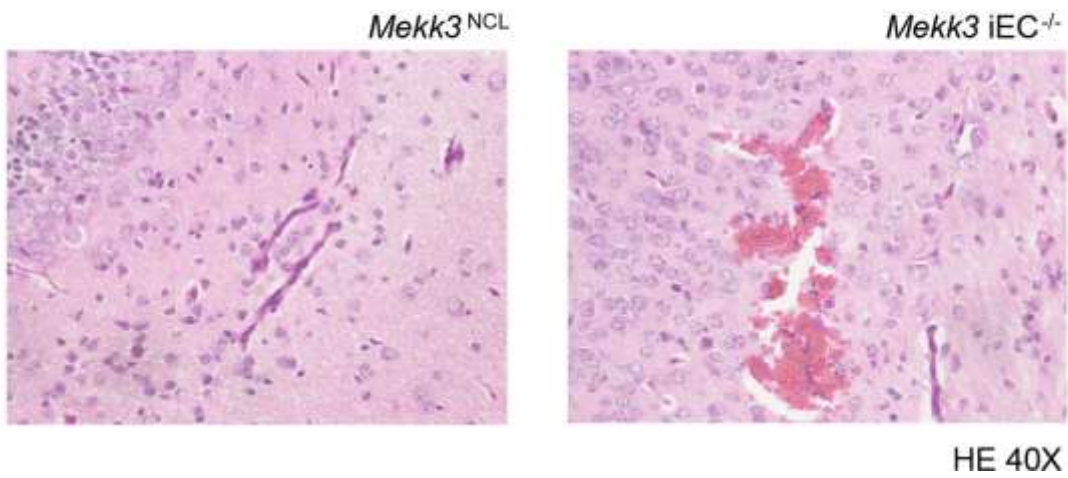

**Supplementary Figure 3. High power magnification of H&E staining of neonatal brain sections.** Hematoxylin and eosin staining of paraffin-embedded sections of *Mekk3*<sup>NCL</sup> and *Mekk3* iEC<sup>-/-</sup> brains.

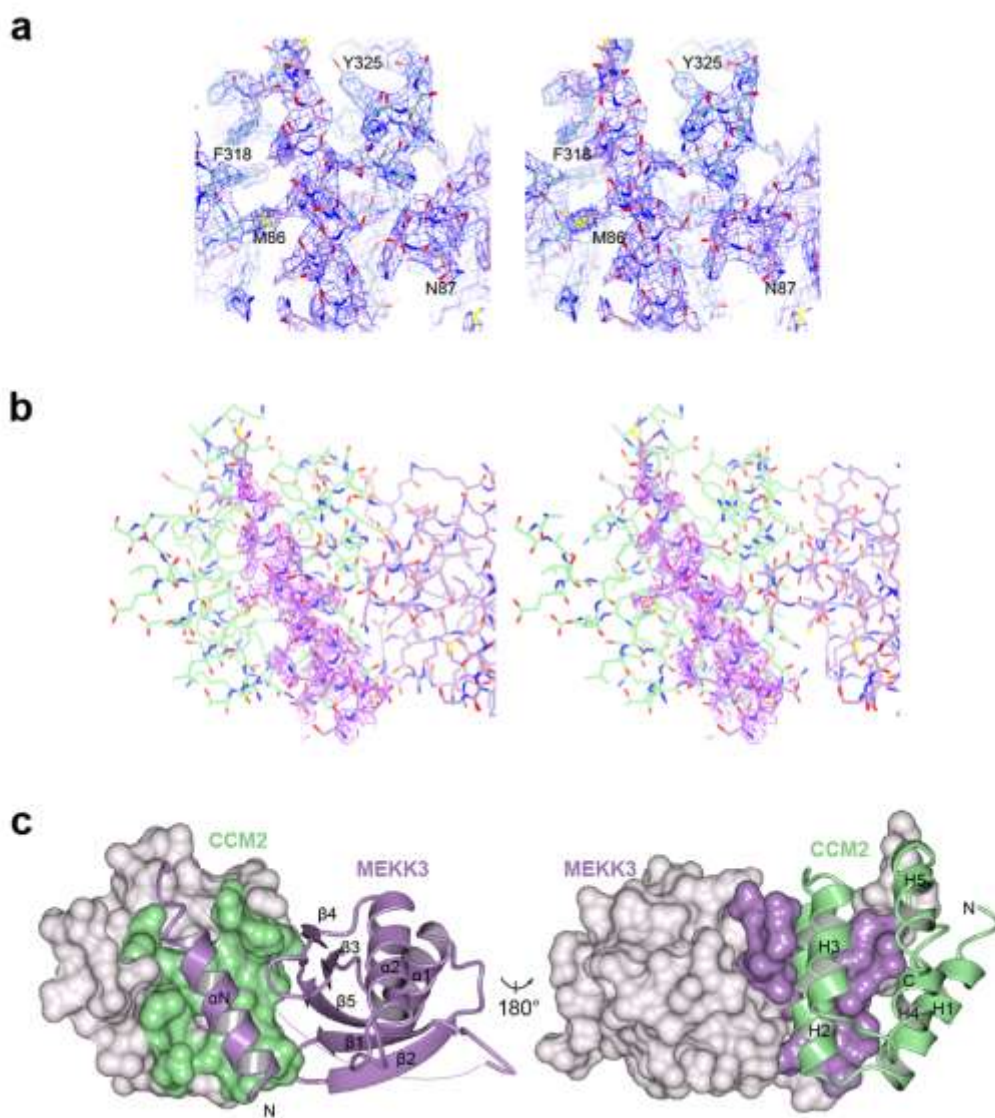

**Supplementary Figure 4. Structure of CCM2<sup>HHD</sup>: MEKK3<sup>NPB1</sup> complex.**

**(a)** Stereoview showing representative  $2F_{\text{obs}}-F_{\text{calc}}$  electron density map contoured at  $1.5\sigma$ .

CCM2<sup>HHD</sup> is shown as green sticks and MEKK3<sup>NPB1</sup> as purple sticks. **(b)** Stereoview showing simulated annealing omit map (purple) for MEKK3  $\alpha\text{N}$  contoured at  $3\sigma$ . The final refined model is shown in stick format. For clarity the map is clipped at  $1.5\text{ \AA}$  away from MEKK3  $\alpha\text{N}$ . **(c)** Left panel shows CCM2 in surface representation with residues involved in the MEKK3 interaction in

green, and MEKK3 represented as ribbons. Right panel shows MEKK3 as a surface with CCM2 interacting residues highlighted in purple with CCM2 depicted as ribbons. The amino acid

sequences of proteins crystallized were MEKK3: GSMDEQEALNSIMNDLVAL

QMNRRHRMPGYETMKNKDTGHSNRQSDVRIKFEHNGERRIIAFSRPVKYEDVEHKVTTVFG

QPLDLHYMNNELSILLKNQDDLKIDILDRSSSMKSLRILLLSQD and CCM2: GSKTISESELS

ASATELLQDYMLTLRKLSSQEIQQFAALLHEYRNGASIHFCINLRQLYGDSRKFLLLGLRPF

IPEKDSQHFENFLETIGVKDGRG.

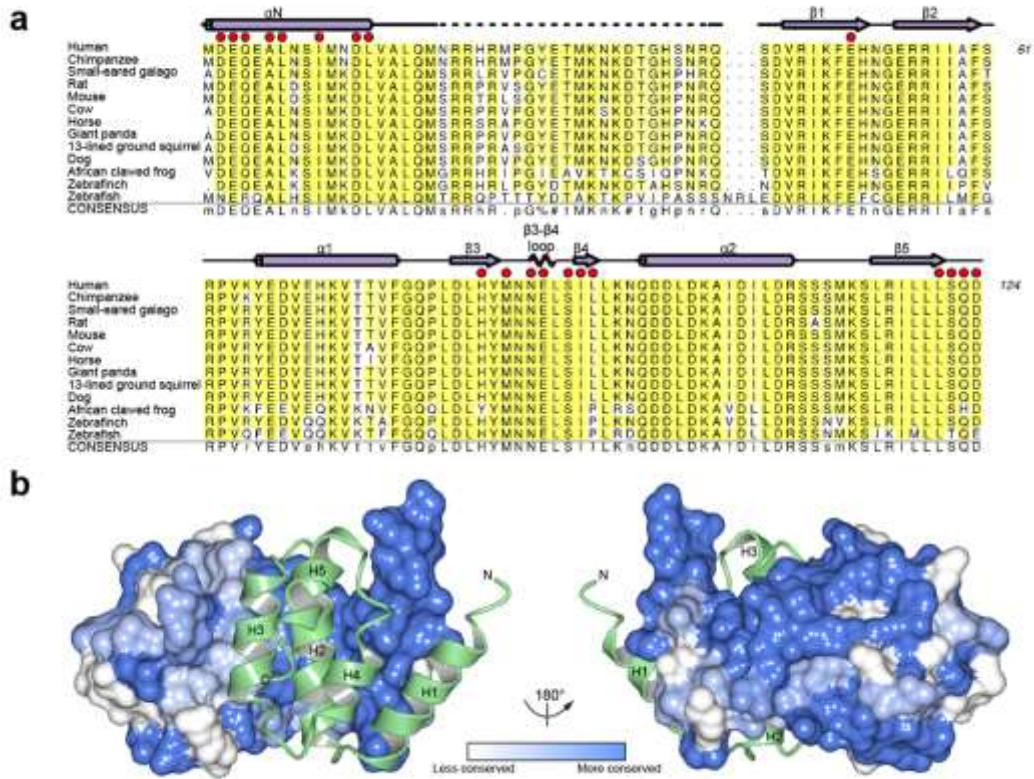

### Supplementary Figure 5. MEKK3 alignment and interacting residues.

(a) Sequence conservation of MEKK3<sup>NPB1</sup> over evolution. Crystallographically-determined secondary structure elements are indicated above the alignment with  $\alpha$ -helices shown as cylinders,  $\beta$ -strands as arrows,  $3_{10}$  helix as a wave, and unstructured residues as a dashed line. Residues involved in the interaction with CCM2 are denoted by red dots. Species shown are: Q99759, *Homo sapiens* (indicated as Human); K6ZLE7, *Pan troglodytes* (Chimpanzee); H0WV28, *Otolemur garnettii* (Small-eared galago); B5DF98, *Rattus norvegicus* (Rat); Q61084, *Mus musculus* (Mouse); F1MH06, *Bos taurus* (Cow); F6WM48, *Equus caballus* (Horse); G1L9C7, *Ailuropoda melanoleuca* (Giant panda); I3MCG3, *Spermophilus tridecemlineatus* (13-lined ground squirrel); F1P750, *Canis familiaris* (Dog); F6X5R9, *Xenopus tropicalis* (African

clawed frog); H0YUP8, *Taeniopygia guttata* (Zebrafinch); and E7EXX1, *Danio rerio* (Zebrafish).

**(b)** Surface conservation of MEKK3. Completely conserved residues are shown in blue.

Conservation over 13 sequences and color coding calculated using the ConSurf server<sup>37</sup>.

MEKK3 shown as a surface, CCM2 is shown in cartoon format and colored green.



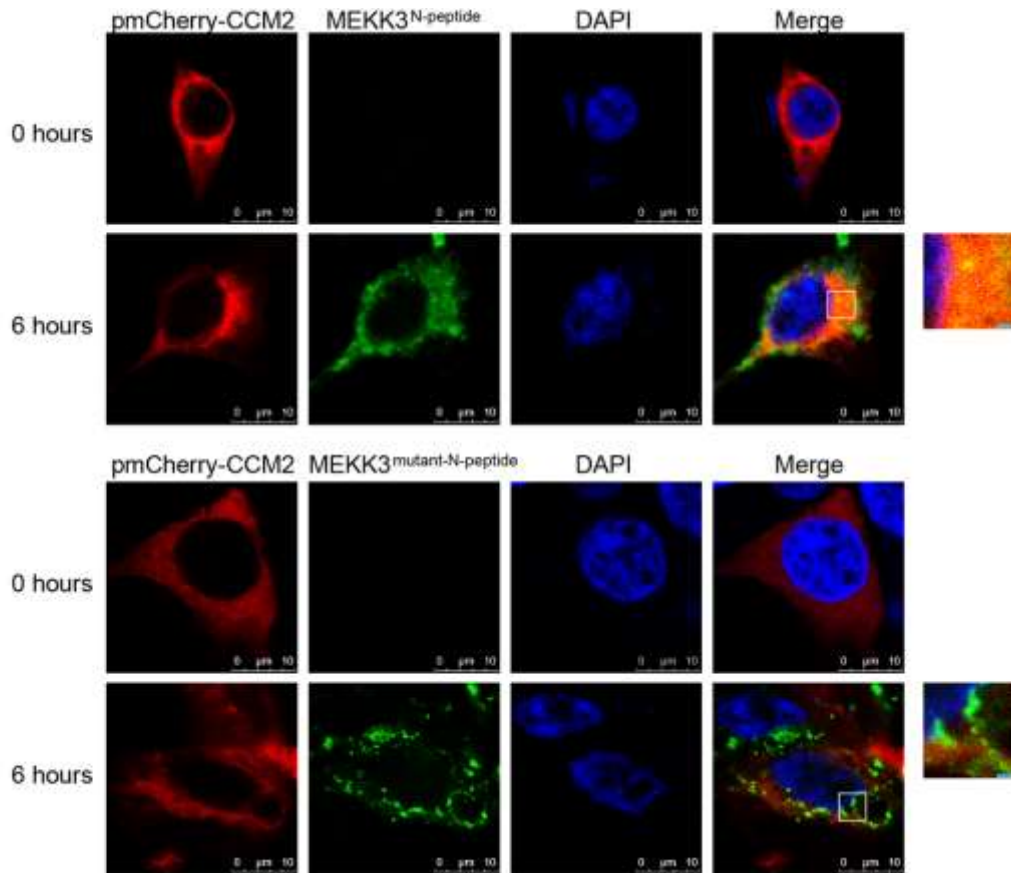

**Supplementary Figure 6. Visualization of cell permeable peptides in cultured cells.**

HeLa cells transfected with pmCherry-CCM2 were incubated with MEKK3<sup>N-peptide</sup> or MEKK3<sup>mutant-N-peptide</sup> for at 0 or 6 h. Cells were stained with DAPI for nucleus (Blue), and pmCherry-CCM2 and peptides were visualized with a Leica LM8 confocal microscopy. White scale bars indicate 10 μm; cyan scale bars indicate 1 μm. Power of objective lens: 63X.

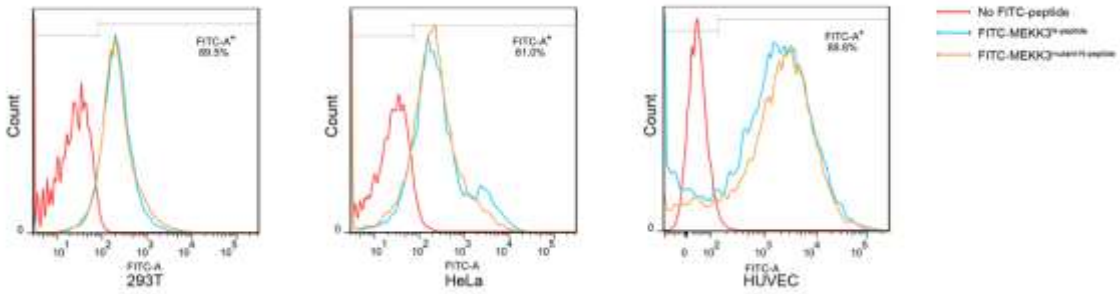

**Supplementary Figure 7. Cells loaded with cell permeable peptides assayed by flow cytometry.** HeLa or HUVEC cells were incubated with MEKK3<sup>N-peptide</sup> or MEKK3<sup>mutant-N-peptide</sup> for 24 h and the cells were trypsinized and analyzed by flow cytometry for peptide-loaded cells.

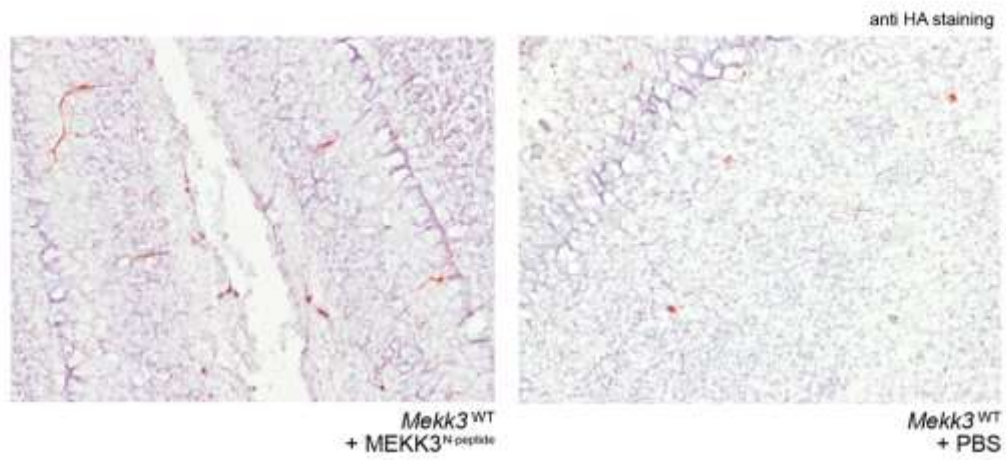

**Supplementary Figure 8. Staining for cell permeable peptides in brain sections.**

Paraffin-embedded brain sections of *Mekk3*<sup>WT</sup> pups treated with HA-tagged cell permeable peptides were immunostained with an anti-HA antibody. Power of objective lens: 10X.

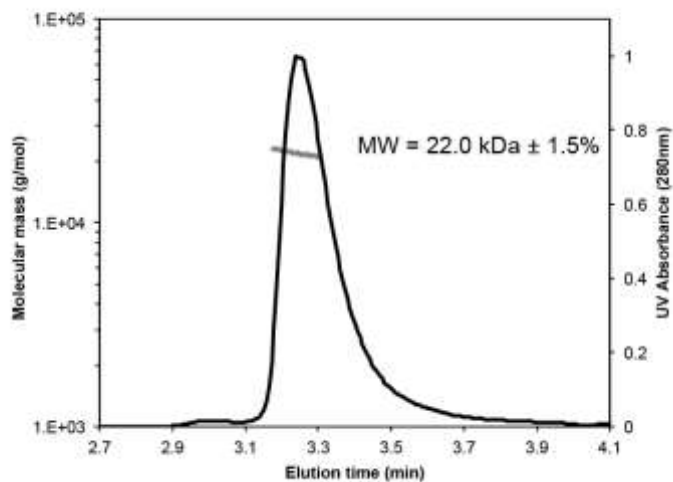

**Supplementary Figure 9. SEC-MALS shows a 1:1 complex of MEKK3<sup>NPB1</sup> and CCM2<sup>HHD</sup>.**

Size exclusion chromatography with Multi-Angle Light Scattering for MEKK3<sup>NPB1</sup>:CCM2<sup>HHD</sup> complex indicates a molecular mass for the complex of 22 kDa  $\pm$  1.5%, compared to the expected molecular mass for a 1:1 complex of 25.5 kDa.

**Fig 1i**

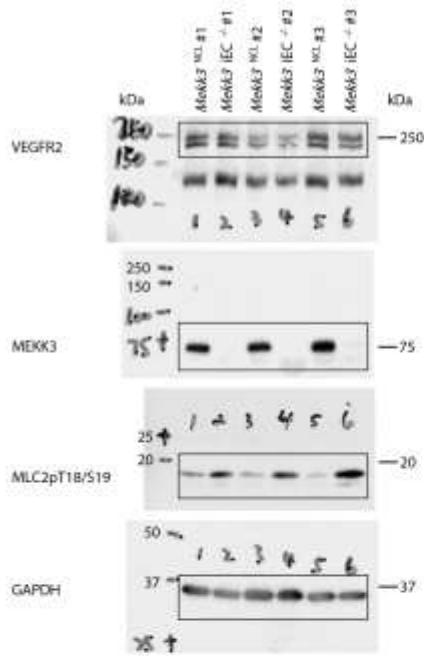

**Fig 2a**

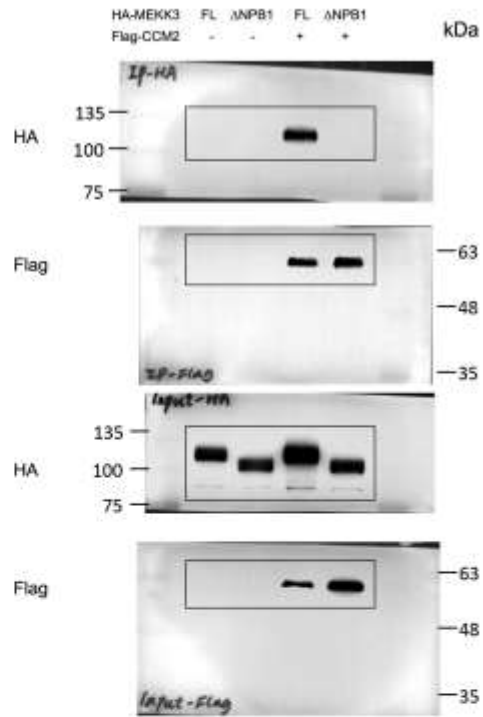

**Fig 2c**

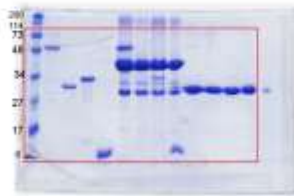

**Fig 2d**

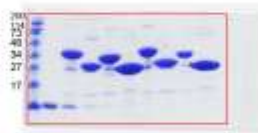

**Fig 2h**

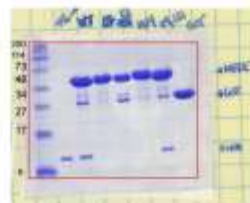

**Fig 2i**

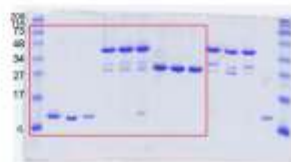

Supplementary Figure 10. Full size gels and blots.

**Fig 3a**

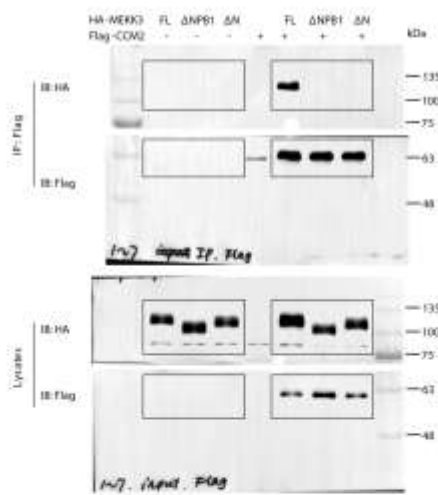

**Fig 3b**

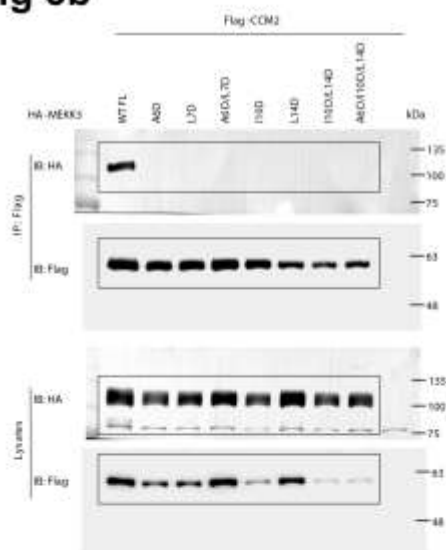

**Fig 3c**

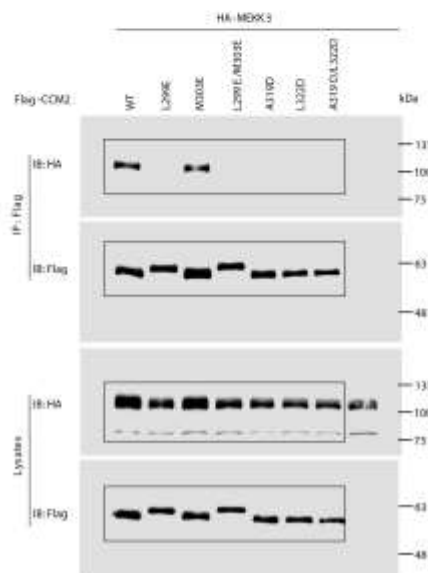

**Fig 3d**

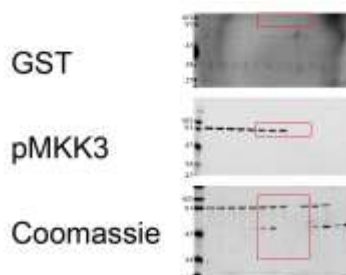

**Supplementary Figure 11. Full size gels and blots.**

**Fig 3e**

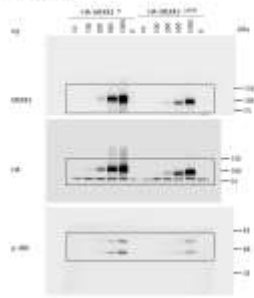

**Fig 3f**

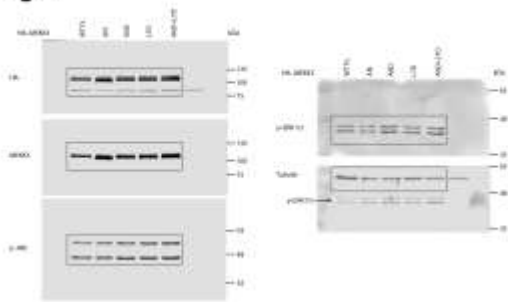

**Fig 3h**

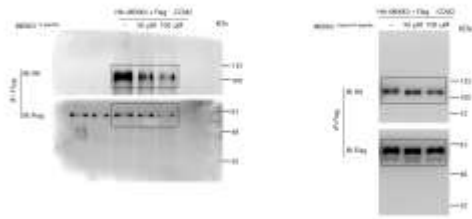

**Fig 3i**

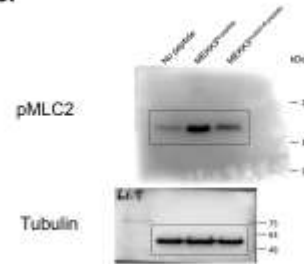

**Supplementary Figure 12. Full size gels and blots.**

**Supplementary Table 1. Isothermal Titration Calorimetry measurements.** NB indicates no binding observed.

| <b>CCM2<sup>HHD</sup></b><br><b>(titrant)</b> | <b>MEKK3<sup>NPB1</sup></b><br><b>(sample cell)</b> | <b><math>K_d</math> (<math>\mu\text{M}</math>)</b> | <b>N</b><br><b>(stoichiometry)</b> | <b><math>\Delta\text{H}</math> (kJ/mol)</b> | <b><math>\Delta\text{S}</math></b><br><b>(J/mol*K)</b> | <b><math>K_a</math> (1/M)</b> |
|-----------------------------------------------|-----------------------------------------------------|----------------------------------------------------|------------------------------------|---------------------------------------------|--------------------------------------------------------|-------------------------------|
| 550 $\mu\text{M}$ WT                          | 39 $\mu\text{M}$ WT                                 | 1.23                                               | 0.90                               | -17.1                                       | 55.4                                                   | 789000                        |
| 620 $\mu\text{M}$ WT                          | 86 $\mu\text{M}$ WT                                 | 1.02                                               | 0.46                               | -8.3                                        | 86.7                                                   | 976000                        |
| 660 $\mu\text{M}$ WT                          | 96 $\mu\text{M}$ WT                                 | 0.79                                               | 0.29                               | -9.4                                        | 85.3                                                   | 1260000                       |
| 633 $\mu\text{M}$ WT                          | 135 $\mu\text{M}$ WT                                | 2.59                                               | 0.53                               | -14.5                                       | 58.3                                                   | 386000                        |
| <b>Average</b>                                |                                                     | 1.41                                               | 0.54                               | -12.3                                       | 71.4                                                   | 852750                        |
| <b>Standard Deviation</b>                     |                                                     | 0.81                                               | 0.26                               | 4.2                                         | 16.9                                                   | 366498                        |
| <b>Standard Error of the Mean</b>             |                                                     | 0.36                                               | 0.11                               | 1.9                                         | 7.6                                                    | 163903                        |
| 600 $\mu\text{M}$ WT                          | 80 $\mu\text{M}$ D13R                               | NB                                                 |                                    |                                             |                                                        |                               |
| 600 $\mu\text{M}$ WT                          | 80 $\mu\text{M}$<br>A6D/L7D                         | NB                                                 |                                    |                                             |                                                        |                               |
| 620 $\mu\text{M}$<br>A319D/A320D              | 86 $\mu\text{M}$ WT                                 | NB                                                 |                                    |                                             |                                                        |                               |



**Supplementary Table 2.** 7 Day survival table for different doses of Y27632. Number of surviving pups indicated.

| Rescued with 10 µg/g Y27632, fed starting Day 1 |   |   |   |   |   |   |   |
|-------------------------------------------------|---|---|---|---|---|---|---|
| Days                                            | 1 | 2 | 3 | 4 | 5 | 6 | 7 |
| WT                                              | 4 | 4 | 4 | 4 | 4 | 4 | 4 |
| EC-iKO                                          | 5 | 5 | 5 | 3 | 3 | 2 | 0 |
|                                                 |   |   |   |   |   |   |   |
| Rescued with 2.5 µg/g Y27632                    |   |   |   |   |   |   |   |
| Days                                            | 1 | 2 | 3 | 4 | 5 | 6 | 7 |
| WT                                              | 4 | 4 | 4 | 4 | 4 | 4 | 4 |
| EC-iKO                                          | 2 | 2 | 2 | 2 | 2 | 1 | 0 |
|                                                 |   |   |   |   |   |   |   |
| Rescued with 2 µg/g Y27632                      |   |   |   |   |   |   |   |
| Days                                            | 1 | 2 | 3 | 4 | 5 | 6 | 7 |
| WT                                              | 5 | 5 | 5 | 5 | 5 | 5 | 5 |
| EC-iKO                                          | 2 | 2 | 2 | 1 | 1 | 1 | 1 |
|                                                 |   |   |   |   |   |   |   |
| Rescued with 1 µg/g Y27632                      |   |   |   |   |   |   |   |
| Days                                            | 1 | 2 | 3 | 4 | 5 | 6 | 7 |
| WT                                              | 3 | 3 | 3 | 3 | 3 | 3 | 3 |
| EC-iKO                                          | 5 | 5 | 5 | 5 | 5 | 5 | 5 |

**Supplementary Table 3.** Survival data on treatment with Y27632. Data used to generate Figure 4e. Number of surviving pups indicated.

| Days                                            | 1  | 2  | 3  | 4  | 5  | 6  | 7  | 8  | 9  | 10 | 11 | 12 | 13 | 14 | 15 | 16 | 17 | 18 | 19 | 20 |
|-------------------------------------------------|----|----|----|----|----|----|----|----|----|----|----|----|----|----|----|----|----|----|----|----|
| Mekk3 NCL (number of mice surviving)            | 16 | 16 | 16 | 16 | 16 | 16 | 16 | 16 | 16 | 16 | 16 | 16 | 16 | 16 | 16 | 16 | 16 | 16 | 16 | 16 |
| Mekk3-iEC-/- (number of mice surviving)         | 16 | 16 | 16 | 15 | 15 | 13 | 11 | 9  | 7  | 7  | 7  | 7  | 7  | 6  | 6  | 6  | 6  | 5  | 5  | 5  |
| Mekk3 NCL +Y27632 (number of mice surviving)    | 16 | 16 | 16 | 16 | 16 | 16 | 16 | 16 | 16 | 16 | 13 | 13 | 13 | 13 | 13 | 13 | 13 | 13 | 13 | 13 |
| Mekk3-iEC-/- +Y27632 (number of mice surviving) | 13 | 13 | 13 | 13 | 13 | 13 | 12 | 12 | 10 | 9  | 9  | 9  | 8  | 7  | 6  | 5  | 5  | 5  | 5  | 5  |
|                                                 |    |    |    |    |    |    |    |    |    |    |    |    |    |    |    |    |    |    |    |    |

**Supplementary Table 4. Primers used.**

|                     |         |                                                             |
|---------------------|---------|-------------------------------------------------------------|
| MEKK3 ΔN            | Forward | CGACGTGCCGACTACGCTTCatgagccgacgaacccggtgtctgg               |
|                     | Reverse | ccagacaaccgggtctgctggctcatGGAAGCGTAGTCCGGCACGTCG            |
| MEKK3 A6D           | Forward | gatgaacaagagGATttagactcgatcatgaaggacctgg                    |
|                     | Reverse | ccaggtccttcatgatcgagctaaATCctctgttcatc                      |
| MEKK3 L7D           | Forward | gatgaacaagaggcaGATgactcgatcatgaaggacctgg                    |
|                     | Reverse | ccaggtccttcatgatcgagtcATCtgcctctgttcatc                     |
| MEKK3 A6D/L7D       | Forward | atggatgaacaagagGATGATgactcgatcatgaaggacctggg                |
|                     | Reverse | caccaggtccttcatgatcgagtcATCATCctctgttcatccat                |
| MEKK3 I10D          | Forward | caagaggcattagactcgGACatgaaggacctggggccc                     |
|                     | Reverse | gggccaccaggtccttcatGTCcgagtctaagcctcttg                     |
| MEKK3 L14D          | Forward | gactcgatcatgaaggacGATgtggccctccagatgagccg                   |
|                     | Reverse | cggctcatctggagggccacATCgtccttcatgatcgagtc                   |
| MEKK3 I10D/L14D     | Forward | gaacaagaggcattagactcgGACatgaaggacGATgtggccctccagatgagccgacg |
|                     | Reverse | cgctggctcatctggagggccacATCgtccttcatGTCcgagtctaagcctctgttc   |
| MEKK3 A6D/I10D/L14D | Forward | gaacaagagGATttagactcgGACatgaaggacGATgtggccctccagatgagccgacg |
|                     | Reverse | cgctggctcatctggagggccacATCgtccttcatGTCcgagtctaaATCctctgttc  |
| MEKK3 D13R          | Forward | gcattagactcgatcatgaagAGGctggtggccctccagatgag                |
|                     | Reverse | ctcatctggagggccaccagCCTcttcatgatcgagtctaagtc                |
| CCM2 L299E          | Forward | gccagcgccactgagctgGAGcaggactacatgctgacgc                    |
|                     | Reverse | gcgtcagcatgtagtctgCTCagctcagtgggcgtggc                      |
| CCM2 M303E          | Forward | gagctgctgcaggactacGAGctgacgctgcgaccaagc                     |
|                     | Reverse | gcttgggctgcagcgtcagCTCgtagtctgcagcagctc                     |
| CCM2 L299E/M303E    | Forward | gcgccagcgccactgagctgGAGcaggactacGAGctgacgctgcgaccaagc       |
|                     | Reverse | gcttgggctgcagcgtcagCTCgtagtctgCTCagctcagtgggcgtggcg         |
| CCM2 A319D          | Forward | cacaggagatccagcagtttGATgcactgctgcagagtaccgc                 |
|                     | Reverse | gcggtactcgtgcagcagtcATCaaactgctggatctctgtg                  |
| CCM2 L322D          | Forward | ccagcagtttgcagcactgGACcagcagtagcgaatggg                     |
|                     | Reverse | cccattgctgactcgtgGTCcagtgctgcaaactgctgg                     |
| CCM2 A319D/L322D    | Forward | catcacaggagatccagcagtttGATgcactgGACcagcagtagcgaatggggcc     |
|                     | Reverse | ggccccattgctgactcgtgGTCcagtgATCaaactgctggatctctgtgatg       |
| CCM2 A320D          | Forward | cacaggagatccagcagtttgaGATctgctgcagagtaccgc                  |
|                     | Reverse | gcggtactcgtgcagcagATCtgcaaactgctggatctctgtg                 |
| CCM2 A319D/A320D    | Forward | cacaggagatccagcagtttGATGATctgctgcagagtaccgcaatggg           |
|                     | Reverse | cccattgctgactcgtgcagcagATCATCaaactgctggatctctgtg            |
| GST-MEKK3 1-124     | Forward | atc tag aat tcg atg gac gaa cag gag gca                     |
|                     | Reverse | G GGG TCG AC A TCA GTC CTG GGA CAA CAG CAA                  |
| GST-MEKK3 1-36      | Forward | gacctgaagaacaaagacacatagcactcaaataggcagagtgacg              |
|                     | Reverse | cgctactctgcctatttgagtgtatgtgtcttcttctcatggc                 |

|                         |         |                                                        |
|-------------------------|---------|--------------------------------------------------------|
| GST-MEKK3 37-124        | Forward | atc tag aat tcg ggt cac tca aat agg cag                |
|                         | Reverse | G GGG TCG AC A TCA GTC CTG GGA CAA CAG CAA             |
| His-CCM2 1-438          | Forward | atcggatccatggaagaggagggaagaag                          |
|                         | Reverse | ccggaattcattagctgcagcccagcgcctcaat                     |
| His-CCM2 51-251         | Forward | atcggatccgagcgcgctcagccagacaga                         |
|                         | Reverse | ccggaattcattaagagtcacgctgtgcagggg                      |
| His-CCM2 231-438        | Forward | ATC GGATCC AGA GCG ATA TTT GAT GGG GCC TCT             |
|                         | Reverse | ccggaattcattagctgcagcccagcgcctcaat                     |
| His-CCM2 283-379        | Forward | gaaggatggccgcgctagatcactgacagctttgg                    |
|                         | Reverse | ccaaagctgtcagtgtatcagccgcgccatcctc                     |
| CCM2 A319D/A320D        | Forward | caggagatccagcagtttgatgatctgctgcacgagtaccgca            |
|                         | Reverse | tgccgtactcgtgcagcagatcatcaaactgctggatctcctg            |
| CCM2 A319D/A322D        | Forward | caggagatccagcagtttgatgactggatcacgagtaccgcaatgggg       |
|                         | Reverse | ccccattgcggtactcgtgatccagtgcatcaaactgctggatctcctg      |
| MEKK3 A6D/L7D           | Forward | gggaattcgtggacgaacaggaggatgataactcaatcatgaacgatctgggtg |
|                         | Reverse | ccaccagatcgttcatgattgagttatcatcctcctgttccatcgaattccc   |
| MEKK3 D13R              | Forward | cattgaactcaatcatgaaccgtctggtggccctccagatg              |
|                         | Reverse | catctggagggccaccagacggttcatgattgagttcaatg              |
| MEKK3 I10D/L14D         | Forward | acaggaggcattgaactcagacatgaacgatgatgtggccctccagatgaacc  |
|                         | Reverse | ggttcatctggagggccacatcatcgttcatgtctgagttcaatgcctcctgt  |
| MEKK3 L119E/L121E       | Forward | agaagctcaagcatgaaaagccttaggatagagctggagtcccaggactgatgt |
|                         | Reverse | acatcagtcctgggactccagctctatcctaaggcttttcatgcttgagcttct |
|                         |         |                                                        |
| For genotyping Mekk3 KO | #105    | TCG CAG CGC ATC GCC TTC TA                             |
| For genotyping Mekk3 KO | #107    | ATG TGA AGC TTG GGG ATT TTG                            |
| For genotyping Mekk3 KO | #174    | TGG TTA GAC TCA CTG GTC AGA GAC                        |
| Mekk3+                  |         | #107 and #174 (900 bp)                                 |
| Mekk3-                  |         | #107 and #105 (830 bp)                                 |
| Mekk3 Flox              |         | #107 and #174 (1000 bp)                                |
|                         |         |                                                        |
